# Supplementary material
Source: MDPI journal article supplement (https://www.mdpi.com/2306-5338/8/3/96)

**Supplementary Materials for the article entitled: “Long-term concentrations and exportations of four dissolved macronutrients from two agroforestry catchments in NW Spain”, authored by R. da Silva Dias, J.M. Mirás-Avalos and A. Paz-González**

**Table S1.** P-values from the Kolmogorov-Smirnoff tests comparing the temporal (on a yearly basis) distribution of sodium and potassium concentrations in waters from the Valiñas catchment. Yellow indicates those differences that are not significant.

| Sodium | 2003     | 2004     | 2005    | 2006     | 2007    | 2008     | 2009     | 2010    | 2011     | 2012    | 2013  | 2014  | 2015  | 2016 |
|--------|----------|----------|---------|----------|---------|----------|----------|---------|----------|---------|-------|-------|-------|------|
| 2003   | 1        |          |         |          |         |          |          |         |          |         |       |       |       |      |
| 2004   | 0,008215 | 1        |         |          |         |          |          |         |          |         |       |       |       |      |
| 2005   | 0,004243 | 0,2174   | 1       |          |         |          |          |         |          |         |       |       |       |      |
| 2006   | 0,7297   | 0,00292  | 0,01071 | 1        |         |          |          |         |          |         |       |       |       |      |
| 2007   | 2,74E-06 | 0,1053   | 0,3269  | 1,01E-05 | 1       |          |          |         |          |         |       |       |       |      |
| 2008   | 2,26E-13 | 3,35E-07 | 0,00914 | 7,61E-11 | 0,00173 | 1        |          |         |          |         |       |       |       |      |
| 2009   | 2,16E-08 | 0,00385  | 0,01507 | 2,78E-08 | 0,3886  | 0,00067  | 1        |         |          |         |       |       |       |      |
| 2010   | 0,001332 | 0,5203   | 0,6713  | 0,00019  | 0,2123  | 0,00014  | 0,01994  | 1       |          |         |       |       |       |      |
| 2011   | 1,66E-12 | 7,27E-05 | 0,00565 | 5,43E-10 | 0,07833 | 0,0857   | 0,06838  | 0,00102 | 1        |         |       |       |       |      |
| 2012   | 1,08E-06 | 0,00666  | 0,2335  | 8,90E-07 | 0,1015  | 5,53E-05 | 0,6595   | 0,09955 | 0,01954  | 1       |       |       |       |      |
| 2013   | 0,5128   | 0,03075  | 0,07158 | 0,6688   | 0,00049 | 4,99E-06 | 1,02E-05 | 0,00511 | 7,66E-06 | 0,00033 | 1     |       |       |      |
| 2014   | 0,9791   | 0,1524   | 0,07217 | 0,8505   | 0,0045  | 2,36E-05 | 0,00039  | 0,03375 | 4,63E-05 | 0,0013  | 0,913 | 1     |       |      |
| 2015   | 0,3119   | 0,141    | 0,09781 | 0,1899   | 0,00779 | 0,00034  | 0,00049  | 0,1247  | 5,27E-05 | 0,00667 | 0,278 | 0,645 | 1     |      |
| 2016   | 0,9046   | 0,2116   | 0,2828  | 0,9778   | 0,08673 | 0,01195  | 0,01119  | 0,0746  | 0,01505  | 0,04092 | 0,977 | 0,953 | 0,259 | 1    |

| Potassium | 2003     | 2004     | 2005     | 2006     | 2007     | 2008     | 2009     | 2010  | 2011  | 2012  | 2013  | 2014  | 2015  | 2016 |
|-----------|----------|----------|----------|----------|----------|----------|----------|-------|-------|-------|-------|-------|-------|------|
| 2003      | 1        |          |          |          |          |          |          |       |       |       |       |       |       |      |
| 2004      | 0,034    | 1        |          |          |          |          |          |       |       |       |       |       |       |      |
| 2005      | 0,051    | 0,011    | 1        |          |          |          |          |       |       |       |       |       |       |      |
| 2006      | 0,073    | 0,263    | 0,256    | 1        |          |          |          |       |       |       |       |       |       |      |
| 2007      | 0,099    | 0,057    | 0,504    | 0,108    | 1        |          |          |       |       |       |       |       |       |      |
| 2008      | 1,70E-12 | 3,60E-11 | 3,50E-05 | 1,00E-07 | 2,60E-05 | 1        |          |       |       |       |       |       |       |      |
| 2009      | 5,50E-11 | 5,80E-10 | 0,0003   | 1,30E-06 | 2,70E-05 | 0,0007   | 1        |       |       |       |       |       |       |      |
| 2010      | 0,142    | 0,002    | 0,617    | 0,073    | 0,664    | 5,60E-05 | 0,0002   | 1     |       |       |       |       |       |      |
| 2011      | 6,00E-04 | 6,20E-05 | 0,166    | 0,018    | 0,134    | 0,0007   | 0,019    | 0,374 | 1     |       |       |       |       |      |
| 2012      | 1,70E-06 | 2,50E-06 | 0,181    | 0,001    | 0,005    | 9,40E-07 | 0,004    | 0,006 | 0,052 | 1     |       |       |       |      |
| 2013      | 0,327    | 0,396    | 0,838    | 0,88     | 0,613    | 0,009    | 0,007    | 0,46  | 0,301 | 0,104 | 1     |       |       |      |
| 2014      | 0,772    | 0,211    | 0,405    | 0,621    | 0,269    | 0,0005   | 0,0004   | 0,47  | 0,139 | 0,02  | 0,796 | 1     |       |      |
| 2015      | 0,732    | 0,269    | 0,068    | 0,393    | 0,154    | 2,70E-05 | 5,90E-05 | 0,195 | 0,022 | 0,003 | 0,391 | 0,459 | 1     |      |
| 2016      | 0,62     | 0,802    | 0,415    | 0,516    | 0,226    | 0,005    | 0,011    | 0,283 | 0,148 | 0,122 | 0,686 | 0,586 | 0,408 | 1    |

**Table S2.** P-values from the Kolmogorov-Smirnoff tests comparing the temporal (on a yearly basis) distribution of calcium and magnesium concentrations in waters from the Valiñas catchment. Yellow indicates those differences that are not significant.

| Calcium | 2003     | 2004     | 2005     | 2006     | 2007     | 2008     | 2009     | 2010  | 2011  | 2012  | 2013  | 2014  | 2015  | 2016 |
|---------|----------|----------|----------|----------|----------|----------|----------|-------|-------|-------|-------|-------|-------|------|
| 2003    | 1        |          |          |          |          |          |          |       |       |       |       |       |       |      |
| 2004    | 0,041    | 1        |          |          |          |          |          |       |       |       |       |       |       |      |
| 2005    | 0,007    | 0,071    | 1        |          |          |          |          |       |       |       |       |       |       |      |
| 2006    | 0,001    | 0,62     | 0,064    | 1        |          |          |          |       |       |       |       |       |       |      |
| 2007    | 6,00E-03 | 0,001    | 0,254    | 2,10E-02 | 1        |          |          |       |       |       |       |       |       |      |
| 2008    | 2,20E-16 | 2,20E-16 | 1,46E-09 | 1,02E-12 | 2,65E-05 | 1        |          |       |       |       |       |       |       |      |
| 2009    | 9,20E-08 | 1,29E-07 | 0,0004   | 2,61E-06 | 2,67E-05 | 0,0007   | 1        |       |       |       |       |       |       |      |
| 2010    | 0,002    | 0,013    | 0,277    | 0,027    | 0,664    | 5,57E-05 | 0,0002   | 1     |       |       |       |       |       |      |
| 2011    | 1,10E-05 | 2,30E-05 | 0,016    | 2,00E-03 | 0,134    | 0,0007   | 0,019    | 0,374 | 1     |       |       |       |       |      |
| 2012    | 1,99E-07 | 4,85E-06 | 0,011    | 1,00E-04 | 0,005    | 9,39E-07 | 0,004    | 0,06  | 0,052 | 1     |       |       |       |      |
| 2013    | 0,813    | 0,842    | 0,093    | 0,501    | 0,613    | 0,009    | 7,00E-03 | 0,46  | 0,301 | 0,104 | 1     |       |       |      |
| 2014    | 0,129    | 0,425    | 0,116    | 0,111    | 0,269    | 5,00E-04 | 0,0004   | 0,47  | 0,139 | 0,02  | 0,796 | 1     |       |      |
| 2015    | 0,416    | 0,85     | 0,166    | 0,589    | 0,154    | 2,71E-05 | 5,96E-05 | 0,195 | 0,022 | 0,003 | 0,391 | 0,459 | 1     |      |
| 2016    | 0,385    | 162      | 0,024    | 0,112    | 0,226    | 0,005    | 0,011    | 0,283 | 0,148 | 0,122 | 0,686 | 0,586 | 0,408 | 1    |

| Magnesium | 2003     | 2004     | 2005  | 2006     | 2007  | 2008  | 2009   | 2010   | 2011   | 2012  | 2013  | 2014  | 2015  | 2016 |
|-----------|----------|----------|-------|----------|-------|-------|--------|--------|--------|-------|-------|-------|-------|------|
| 2003      | 1        |          |       |          |       |       |        |        |        |       |       |       |       |      |
| 2004      | 0,06     | 1        |       |          |       |       |        |        |        |       |       |       |       |      |
| 2005      | 0,0009   | 0,055    | 1     |          |       |       |        |        |        |       |       |       |       |      |
| 2006      | 0,966    | 0,022    | 0,002 | 1        |       |       |        |        |        |       |       |       |       |      |
| 2007      | 9,10E-07 | 8,80E-05 | 0,171 | 5,21E-07 | 1     |       |        |        |        |       |       |       |       |      |
| 2008      | 1,30E-08 | 1,70E-05 | 0,002 | 2,73E-07 | 0,047 | 1     |        |        |        |       |       |       |       |      |
| 2009      | 1,60E-06 | 1,68E-05 | 0,008 | 2,49E-06 | 0,023 | 0,153 | 1      |        |        |       |       |       |       |      |
| 2010      | 0,0003   | 0,031    | 0,858 | 0,0009   | 0,261 | 0,028 | 0,014  | 1      |        |       |       |       |       |      |
| 2011      | 6,10E-08 | 1,00E-04 | 0,046 | 1,60E-07 | 0,562 | 0,253 | 0,192  | 0,153  | 1      |       |       |       |       |      |
| 2012      | 3,70E-07 | 9,20E-05 | 0,033 | 1,96E-06 | 0,01  | 0,015 | 0,482  | 0,051  | 0,032  | 1     |       |       |       |      |
| 2013      | 0,625    | 0,178    | 0,185 | 0,748    | 0,022 | 0,021 | 0,011  | 0,138  | 0,022  | 0,034 | 1     |       |       |      |
| 2014      | 0,589    | 0,386    | 0,007 | 0,784    | 0,001 | 0,006 | 0,0007 | 0,0077 | 0,0002 | 0,001 | 0,676 | 1     |       |      |
| 2015      | 0,463    | 0,647    | 0,131 | 0,485    | 0,005 | 0,002 | 0,0004 | 0,104  | 0,001  | 0,003 | 0,668 | 0,411 | 1     |      |
| 2016      | 0,872    | 0,245    | 0,16  | 0,994    | 0,072 | 0,057 | 0,036  | 0,138  | 0,025  | 0,032 | 0,987 | 0,953 | 0,665 | 1    |

**Table S3.** P-values from the Kolmogorov-Smirnoff tests comparing the temporal (on a yearly basis) distribution of sodium, potassium, calcium and magnesium concentrations in waters from the Abelar catchment. Yellow indicates those differences that are not significant.

| Sodium | 2007      | 2008     | 2009     | 2010      | 2011     | 2012     | 2013    | 2014     | 2015     | 2016 |
|--------|-----------|----------|----------|-----------|----------|----------|---------|----------|----------|------|
| 2007   | 1         |          |          |           |          |          |         |          |          |      |
| 2008   | 0,02139   | 1        |          |           |          |          |         |          |          |      |
| 2009   | 0,009604  | 0,0857   | 1        |           |          |          |         |          |          |      |
| 2010   | 0,5653    | 4,14E-07 | 6,33E-10 | 1         |          |          |         |          |          |      |
| 2011   | 0,005437  | 0,003542 | 0,4038   | 4,48E-09  | 1        |          |         |          |          |      |
| 2012   | 0,3945    | 0,005193 | 0,02405  | 0,0003483 | 0,02073  | 1        |         |          |          |      |
| 2013   | 0,01119   | 1,53E-09 | 7,88E-10 | 0,0002712 | 3,38E-10 | 6,17E-06 | 1       |          |          |      |
| 2014   | 0,01317   | 2,45E-09 | 7,36E-10 | 0,0002563 | 1,36E-10 | 4,33E-06 | 0,6314  | 1        |          |      |
| 2015   | 0,01879   | 4,04E-09 | 2,10E-08 | 0,0005585 | 7,36E-09 | 3,10E-06 | 0,3226  | 0,5182   | 1        |      |
| 2016   | 0,0004278 | 5,81E-07 | 6,38E-07 | 1,30E-06  | 7,09E-07 | 3,07E-05 | 0,08978 | 0,006572 | 0,002051 | 1    |

| Potassium | 2007  | 2008  | 2009   | 2010   | 2011  | 2012  | 2013  | 2014  | 2015  | 2016 |
|-----------|-------|-------|--------|--------|-------|-------|-------|-------|-------|------|
| 2007      | 1     |       |        |        |       |       |       |       |       |      |
| 2008      | 0,016 | 1     |        |        |       |       |       |       |       |      |
| 2009      | 0,815 | 0,008 | 1      |        |       |       |       |       |       |      |
| 2010      | 0,862 | 0,002 | 0,858  | 1      |       |       |       |       |       |      |
| 2011      | 0,009 | 0,343 | 0,002  | 0,003  | 1     |       |       |       |       |      |
| 2012      | 0,003 | 0,199 | 0,0007 | 0,0002 | 0,66  | 1     |       |       |       |      |
| 2013      | 0,739 | 0,06  | 0,821  | 0,728  | 0,089 | 0,026 | 1     |       |       |      |
| 2014      | 0,157 | 0,111 | 0,146  | 0,237  | 0,446 | 0,173 | 0,377 | 1     |       |      |
| 2015      | 0,055 | 0,592 | 0,109  | 0,053  | 0,876 | 0,802 | 0,235 | 0,896 | 1     |      |
| 2016      | 0,136 | 0,512 | 0,288  | 0,27   | 0,786 | 0,6   | 0,474 | 0,977 | 0,999 | 1    |

| Calcium | 2007  | 2008  | 2009   | 2010   | 2011  | 2012  | 2013  | 2014  | 2015  | 2016 |
|---------|-------|-------|--------|--------|-------|-------|-------|-------|-------|------|
| 2007    | 1     |       |        |        |       |       |       |       |       |      |
| 2008    | 0,016 | 1     |        |        |       |       |       |       |       |      |
| 2009    | 0,815 | 0,008 | 1      |        |       |       |       |       |       |      |
| 2010    | 0,862 | 0,002 | 0,858  | 1      |       |       |       |       |       |      |
| 2011    | 0,009 | 0,343 | 0,002  | 0,003  | 1     |       |       |       |       |      |
| 2012    | 0,003 | 0,199 | 0,0007 | 0,0002 | 0,66  | 1     |       |       |       |      |
| 2013    | 0,739 | 0,06  | 0,821  | 0,728  | 0,089 | 0,026 | 1     |       |       |      |
| 2014    | 0,157 | 0,111 | 0,146  | 0,237  | 0,446 | 0,173 | 0,377 | 1     |       |      |
| 2015    | 0,056 | 0,592 | 0,109  | 0,053  | 0,876 | 0,802 | 0,235 | 0,896 | 1     |      |
| 2016    | 0,136 | 0,512 | 0,288  | 0,27   | 0,786 | 0,6   | 0,474 | 0,977 | 0,999 | 1    |

| Magnesium | 2007     | 2008     | 2009     | 2010     | 2011     | 2012     | 2013   | 2014    | 2015    | 2016 |
|-----------|----------|----------|----------|----------|----------|----------|--------|---------|---------|------|
| 2007      | 1        |          |          |          |          |          |        |         |         |      |
| 2008      | 0,411    | 1        |          |          |          |          |        |         |         |      |
| 2009      | 0,364    | 0,07     | 1        |          |          |          |        |         |         |      |
| 2010      | 0,119    | 3,00E-03 | 1,20E-02 | 1        |          |          |        |         |         |      |
| 2011      | 0,072    | 0,002    | 0,001    | 7,66E-01 | 1        |          |        |         |         |      |
| 2012      | 0,136    | 0,002    | 0,004    | 0,2      | 0,243    | 1        |        |         |         |      |
| 2013      | 6,54E-07 | 1,82E-08 | 8,99E-13 | 1,17E-09 | 2,94E-09 | 5,22E-07 | 1      |         |         |      |
| 2014      | 9,09E-07 | 3,66E-10 | 2,60E-12 | 3,09E-11 | 1,36E-10 | 1,38E-07 | 0,459  | 1       |         |      |
| 2015      | 1,87E-06 | 3,74E-09 | 2,37E-11 | 2,24E-10 | 9,58E-10 | 5,52E-07 | 0,051  | 0,719   | 1       |      |
| 2016      | 2,60E-05 | 3,72E-07 | 3,68E-07 | 4,15E-07 | 2,72E-07 | 3,07E-05 | 0,0007 | 0,00099 | 0,00068 | 1    |

**Figure S1.** Time series seasonal decomposition plots for sodium concentrations at the outlet of the Valiñas catchment during the study period (2003-2016).

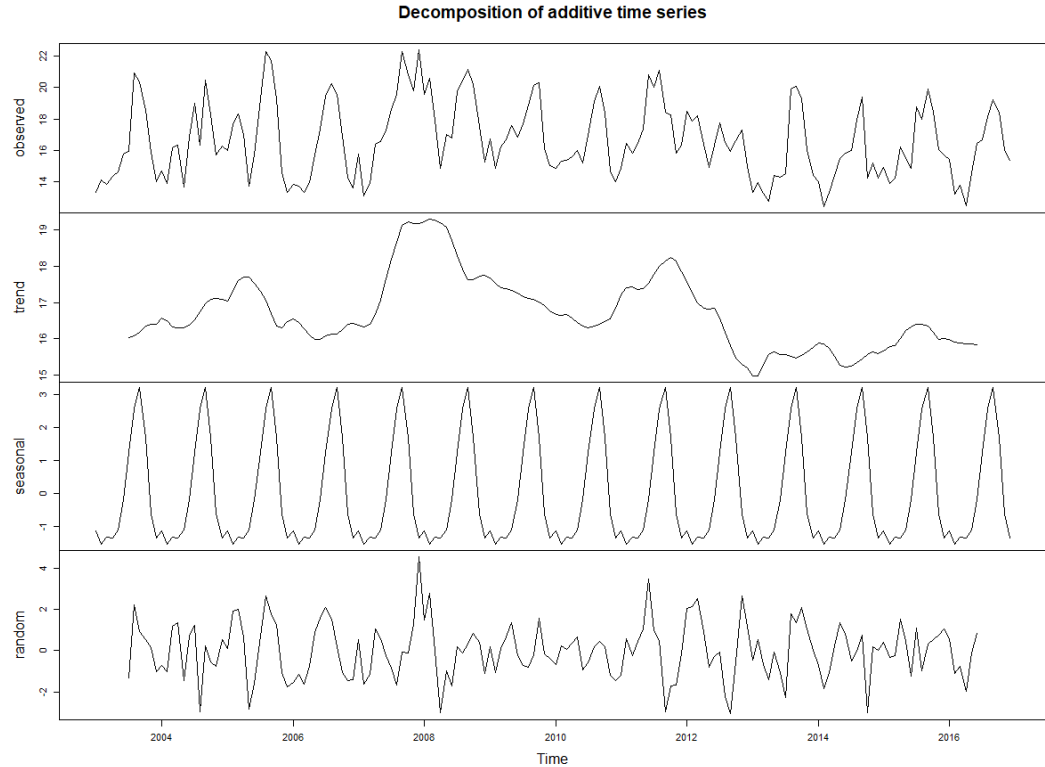

**Figure S2.** Time series seasonal decomposition plots for potassium concentrations at the outlet of the Valiñas catchment during the study period (2003-2016).

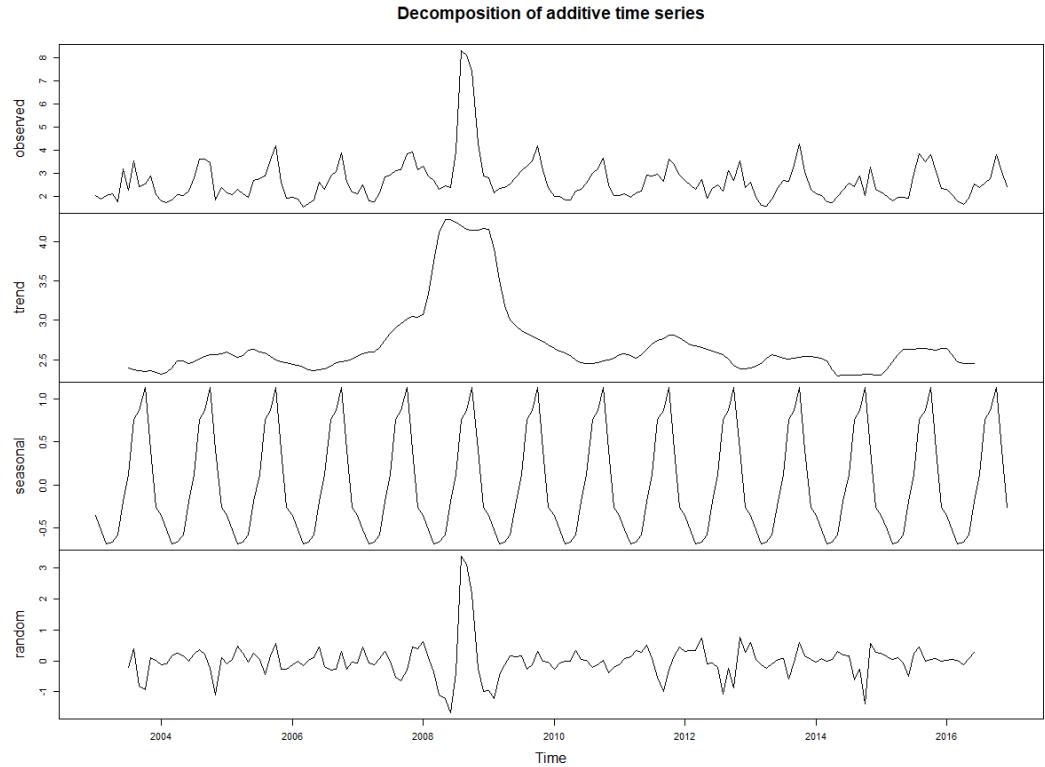

**Figure S3.** Time series seasonal decomposition plots for calcium concentrations at the outlet of the Valiñas catchment during the study period (2003-2016).

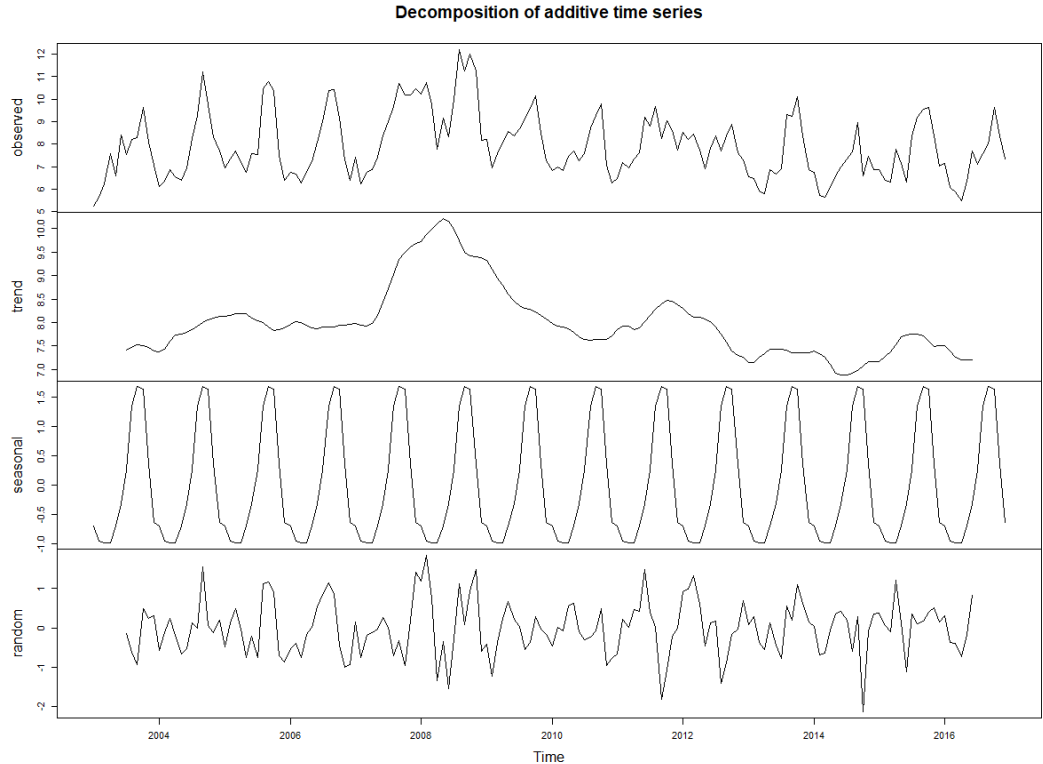

**Figure S4.** Time series seasonal decomposition plots for magnesium concentrations at the outlet of the Valiñas catchment during the study period (2003-2016).

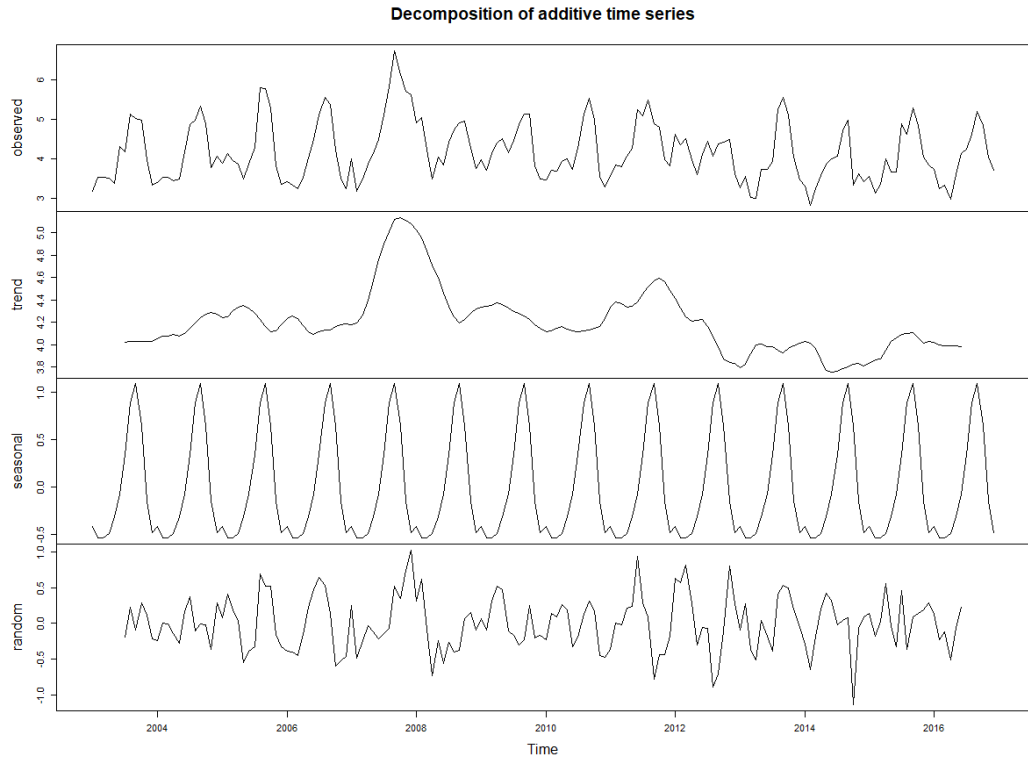

**Figure S5.** Time series seasonal decomposition plots for sodium concentrations at the outlet of the Abelar catchment during the study period (2003-2016).

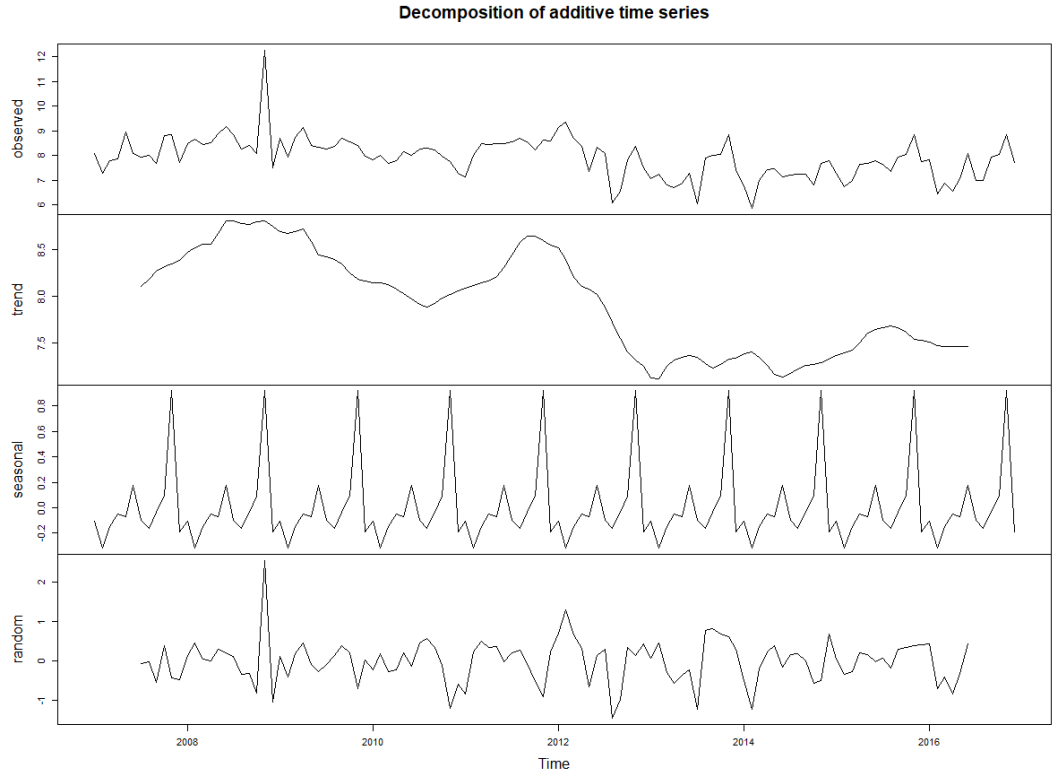

**Figure S6.** Time series seasonal decomposition plots for potassium concentrations at the outlet of the Abelar catchment during the study period (2003-2016).

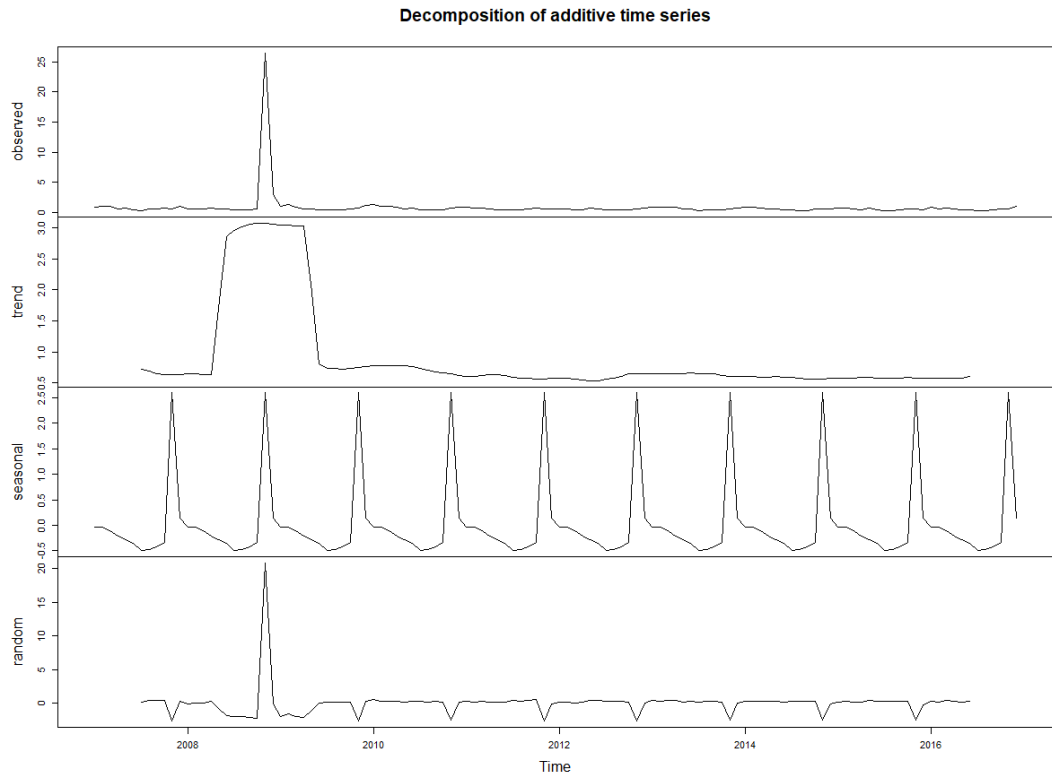

**Figure S7.** Time series seasonal decomposition plots for calcium concentrations at the outlet of the Abelar catchment during the study period (2003-2016).

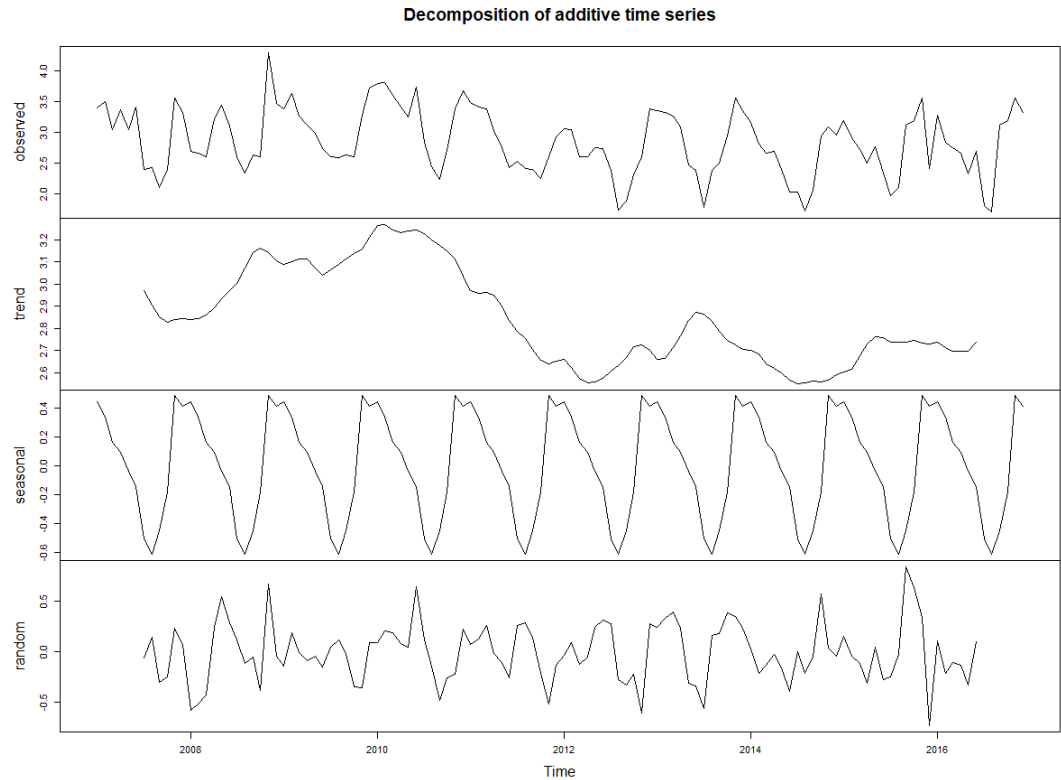

**Figure S8.** Time series seasonal decomposition plots for magnesium concentrations at the outlet of the Abelar catchment during the study period (2003-2016).

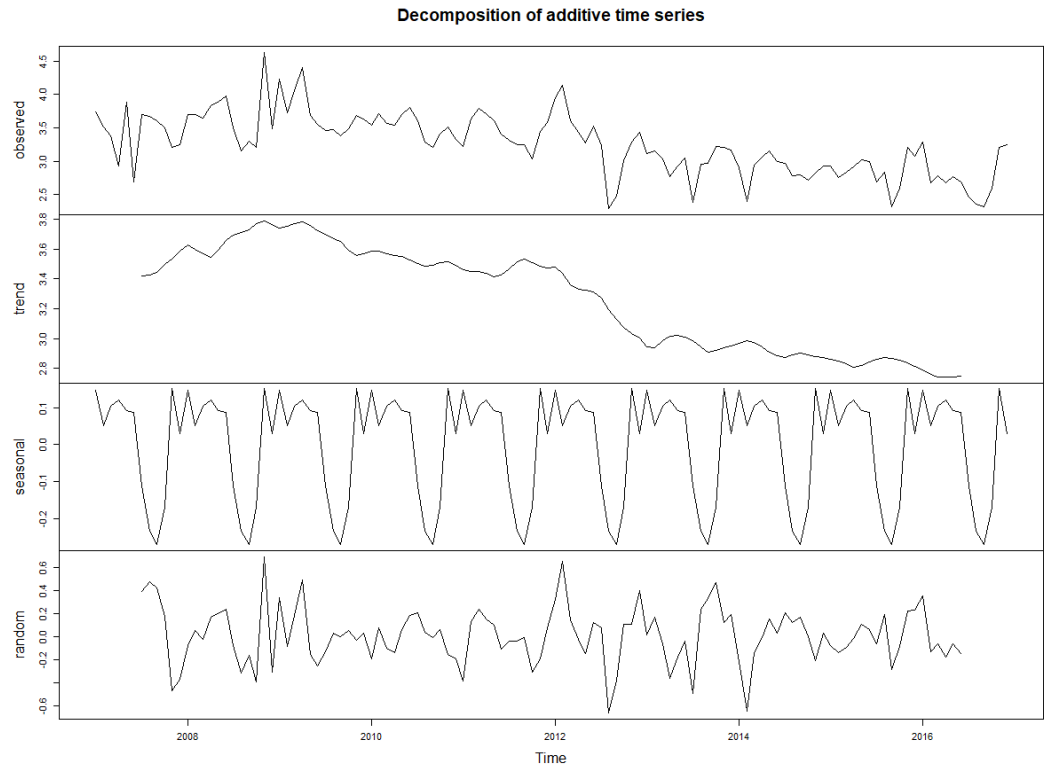

Supplement: s1 [file s1]
